# Opposing Effects of Sirtuins on Neuronal Survival: SIRT1-Mediated Neuroprotection Is Independent of Its Deacetylase Activity

Jason A. Pfister<sup>1</sup>, Chi Ma<sup>1</sup>, Brad E. Morrison, Santosh R. D'Mello\*

Department of Molecular and Cell Biology, University of Texas at Dallas, Richardson, Texas, United States of America

## Abstract

**Background:** Growing evidence suggests that sirtuins, a family of seven distinct NAD-dependent enzymes, are involved in the regulation of neuronal survival. Indeed, SIRT1 has been reported to protect against neuronal death, while SIRT2 promotes neurodegeneration. The effect of SIRT3–7 on the regulation of neuronal survival, if any, has yet to be reported.

**Methodology and Principal Findings:** We examined the effect of expressing each of the seven SIRT proteins in healthy cerebellar granule neurons (CGNs) or in neurons induced to die by low potassium (LK) treatment. We report that SIRT1 protects neurons from LK-induced apoptosis, while SIRT2, SIRT3 and SIRT6 induce apoptosis in otherwise healthy neurons. SIRT5 is generally localized to both the nucleus and cytoplasm of CGNs and exerts a protective effect. In a subset of neurons, however, SIRT5 localizes to the mitochondria and in this case it promotes neuronal death. Interestingly, the protective effect of SIRT1 in neurons is not reduced by treatments with nicotinamide or sirtinol, two pharmacological inhibitors of SIRT1. Neuroprotection was also observed with two separate mutant forms of SIRT1, H363Y and H355A, both of which lack deacetylase activity. Furthermore, LK-induced neuronal death was not prevented by resveratrol, a pharmacological activator of SIRT1, at concentrations at which it activates SIRT1. We extended our analysis to HT-22 neuroblastoma cells which can be induced to die by homocysteic acid treatment. While the effects of most of the SIRT proteins were similar to that observed in CGNs, SIRT6 was modestly protective against homocysteic acid toxicity in HT-22 cells. SIRT5 was generally localized in the mitochondria of HT-22 cells and was apoptotic.

**Conclusions/Significance:** Overall, our study makes three contributions - (a) it represents the first analysis of SIRT3–7 in the regulation of neuronal survival, (b) it shows that neuroprotection by SIRT1 can be mediated by a novel, non-catalytic mechanism, and (c) that subcellular localization may be an important determinant in the effect of SIRT5 on neuronal viability.

**Citation:** Pfister JA, Ma C, Morrison BE, D'Mello SR (2008) Opposing Effects of Sirtuins on Neuronal Survival: SIRT1-Mediated Neuroprotection Is Independent of Its Deacetylase Activity. PLoS ONE 3(12): e4090. doi:10.1371/journal.pone.0004090

**Editor:** Henry Waldvogel, University of Auckland, New Zealand

**Received:** November 4, 2008; **Accepted:** November 27, 2008; **Published:** December 31, 2008

**Copyright:** © 2008 Pfister et al. This is an open-access article distributed under the terms of the Creative Commons Attribution License, which permits unrestricted use, distribution, and reproduction in any medium, provided the original author and source are credited.

**Funding:** This work was supported by NIH grants NS40408 and NS058462 to SRD. The funders had no role in study design, data collection and analysis, decision to publish, or preparation of the manuscript.

**Competing Interests:** The authors have declared that no competing interests exist.

\* E-mail: dmello@utdallas.edu

† These authors contributed equally to this work.

## Introduction

Sirtuins are a family of NAD-dependent enzymes homologous to the yeast Sir2 protein. Overexpression of Sir2 in yeast, *Caenorhabditis elegans* and *Drosophila* increases lifespan by a process believed to be analogous to caloric restriction. More recent work has implicated sirtuins in the control of a variety of biological processes including transcriptional silencing, chromosomal stability, cell cycle progression, apoptosis, autophagy, metabolism, growth suppression, inflammation, and stress response (for recent reviews, [1–4]). Mammals express seven sirtuins, termed SIRT1–SIRT7, which are also referred to as class III histone deacetylases (HDACs). The seven enzymes share a conserved catalytic core domain of approximately 275 amino acids but differ in their amino and carboxyl terminal protein sequences flanking this core. Moreover, while SIRT1, SIRT2, SIRT3, and SIRT5 deacetylate histone and non-histone protein substrates, SIRT4 and SIRT6 are

primarily mono-ADP-ribosyl transferases [5–7]. An activity for SIRT7 has yet to be firmly established. The sirtuins also show differences in their subcellular localization. SIRT1, which has highest sequence similarity to yeast Sir2, is largely nuclear where it deacetylates histones H3 and H4 as well as transcription factors such as NF- $\kappa$ B, p53, FOXO, Ku70, and PGC-1 $\alpha$  (reviewed in [1]; [8]). Although generally described to be a nuclear protein, a few recent studies have described nucleo-cytoplasmic shuttling of SIRT1 in response to oxidative stress [8–10]. More recently novel co-activators of SIRT1 such as AROS and HIC1 and a co-repressor, DBC1, have also been identified that promote and inhibit SIRT1-mediated deacetylation of its targets [11–14]. SIRT2 resides mostly in the cytoplasm where it associates with microtubules and deacetylates  $\alpha$ -tubulin [5,15]. When the nuclear envelope disassembles during mitosis, however, SIRT2 can also deacetylate histone H4 [16]. SIRT3, SIRT4, and SIRT5 localize to the mitochondria and are therefore thought to play a role in

energy metabolism and responses to oxidative stress [17]. Within the mitochondria, these SIRT proteins appear to localize to different sub-compartments, suggesting distinct functions [18]. Like SIRT1, SIRT6 and SIRT7 are nuclear proteins although the three proteins display distinct sub-nuclear localization patterns; SIRT6 associates with heterochromatin, SIRT7 localizes to nucleoli, whereas SIRT1 is largely associated with euchromatin within the nucleus [17].

A growing body of evidence implicates SIRT1 and SIRT2 as important regulators of neurodegeneration [4,19]. For example, the overexpression of SIRT1 prevents neuronal death in tissue culture models of Alzheimer's disease, amyotrophic lateral sclerosis, and polyglutamine toxicity and reduces hippocampal degeneration in a mouse model of Alzheimer's disease toxicity [14,20]. Moreover, treatment with resveratrol, a polyphenolic compound frequently used as a pharmacological activator of SIRT1, is protective in a variety of experimental paradigms of neurodegeneration (reviewed in [21]). Activation of SIRT1 using other non-commercially available compounds has also been reported to be neuroprotective in a model of optic neuritis [22]. On the other hand, SIRT2 has been reported to promote neuronal death. Pharmacological and genetic inhibition of SIRT2 protects neurons against  $\alpha$ -synuclein toxicity *in vitro* as well as in flies [23]. Nothing has been reported about whether the other five sirtuin proteins (SIRT3–7) can influence the survival or death of neurons.

The goal of our study was to gain insight into the roles of different sirtuin proteins in the regulation of neuronal survival. To facilitate a direct comparison of their effects on neuronal viability, we initially utilized a single and well-established paradigm for our study – cultured CGNs. These neurons survive well in medium containing depolarizing levels of potassium but undergo apoptosis in low potassium medium [24]. We report that SIRT1 and SIRT5 protect CGNs from LK-induced apoptosis, while SIRT2, SIRT3 and SIRT6 promote cell death. To investigate whether these effects were also seen in response to other apoptotic stimuli and in other cell types, we subsequently extended our studies to another paradigm of neuronal apoptosis in which HT-22 neuroblastoma cells were induced to die by homocysteic acid treatment [25,26]. While the effects of a majority of the SIRT proteins were similar to that observed in CGNs, in HT-22 cells SIRT5 was found to be apoptotic while SIRT6 had a mildly protective effect.

## Results

### Effects of sirtuin expression on neuronal survival

Cultured CGNs undergo apoptosis when switched from medium containing depolarizing levels of potassium (high potassium or HK medium) to medium containing non-depolarizing levels of potassium (low potassium or LK medium) [24]. We used this tissue culture paradigm to look at the effect of forced expression of each of the seven sirtuin proteins on neuronal survival or death. As shown in Fig. 1A, overexpression of SIRT1 had no effect on neuronal survival in HK, but completely inhibited LK-induced cell death. Although generally present in the nucleus, nucleo-cytoplasmic shuttling of SIRT1 has recently been described [8,27]. In CGNs, ectopically-expressed SIRT1 localizes to the nucleus in both HK and LK conditions (Fig. 2A). Although the effect of SIRT1 expression has not been previously studied in CGNs, our result is consistent with the neuroprotective action of this sirtuin observed in other cell culture and *in vivo* experimental models of neurodegeneration [14,20]. Neuroprotection was also observed with SIRT1 conjugated to an N-terminus HA-tag ruling out the possibility that the Flag-tag itself contributed to its protective efficacy (Fig. 1B). We also expressed a truncated version

of SIRT1 lacking the first 81 amino acids (Trunc-SIRT1-Flag), but which has been found to retain its catalytic activity [5]. Previous studies have suggested that the N-terminus region of SIRT1 is involved in interaction with other proteins and contains two potential phosphorylation sites (Ser27 and Ser47; [28,29]). Trunc-SIRT1-Flag was as effective as the full-length form in inhibiting neuronal death (Fig. 1B).

Pharmacological and genetic inhibition of SIRT2 has been shown to protect against  $\alpha$ -synuclein toxicity in cultured neurons and in *Drosophila* suggesting that SIRT2 is involved in promoting neurodegeneration [30]. Consistent with these findings, SIRT2 overexpression reduces survival of otherwise healthy neurons (Fig. 1A). In other cell types, SIRT2 is generally cytoplasmic but translocates to the nucleus during mitosis [16]. We observed that SIRT2 displays a cytoplasmic localization in CGNs which is not altered during apoptosis (Fig. 2A).

The overexpression of SIRT3 in CGNs induces death in HK and increases the extent of cell death in LK medium (Fig. 1A). As observed previously, SIRT3 localizes to mitochondria in these neurons (Fig. 2B) [17]. Overexpression of SIRT4 had no effect on neuronal viability in either HK or LK medium (Fig. 1A). Like SIRT3, and as previously reported [17], the localization of SIRT4 in CGNs is mitochondrial (Fig. 2B).

SIRT5 overexpression inhibits LK-induced apoptosis (Fig. 1A). In contrast to previous studies in which SIRT5 expression was restricted to mitochondria of non-neuronal cell types [17], in a majority of CGNs SIRT5 is widely distributed displaying nuclear, cytoplasmic and mitochondrial localization (Fig. 2C). In a small proportion of these neurons, however, SIRT5 localized solely in mitochondria (Fig. 2C). An analysis of the relationship between subcellular localization and neuroprotection reveals that SIRT5 is protective when it localizes to the cytoplasm. In contrast, when localized to the mitochondria, SIRT5 promotes apoptosis (Fig. 1C).

Overexpression of SIRT6 promotes neuronal apoptosis, while SIRT7 has no effect on cell viability in HK or LK medium (Fig. 1A). As observed by other investigators in non-neuronal cells, both of these proteins localize predominantly to the nucleus (Fig. 2A).

### Pharmacological modulators of SIRT1 activity have no effect on neuroprotection

Several investigators have found that the anti-apoptotic effect of SIRT1 overexpression in neurons as well as non-neuronal cell types is mimicked by chemical agonists of SIRT1 and can be inhibited by pharmacological inhibitors of this sirtuin [11,31–36]. In these paradigms therefore, the effect of SIRT1 is mediated by its enzymatic activity. To examine whether this was also the case in CGNs, we examined whether nicotinamide could block the protective effect of SIRT1 against LK-induced neuronal death. Nicotinamide is an end-product inhibitor that suppresses the activity of all sirtuins by directly binding within a conserved pocket of the enzyme and inhibiting NAD<sup>+</sup> hydrolysis [37–39]. It is widely used as a sirtuin inhibitor in cell culture studies and nicotinamide's ability to block SIRT1 activity both *in vitro* and in cultured cells has previously been established [5,10,37,40–42]. Surprisingly, nicotinamide fails to reduce the neuroprotective activity of SIRT1 in CGNs (Fig. 3A). Another more selective and potent pharmacological inhibitor of SIRT1 is sirtinol [30,43–45]. As seen in Figure 3B, sirtinol had no effect on SIRT1-mediated neuronal survival. We also used splitomicin, a recently developed sirtuin inhibitor [46,47]. Like nicotinamide and sirtinol, treatment of neurons with splitomicin failed to block neuroprotection by SIRT1 in LK (data not shown).

Resveratrol is a potent pharmacological agonist of SIRT1 [48]. Treatment with this polyphenol induces deacetylation of known

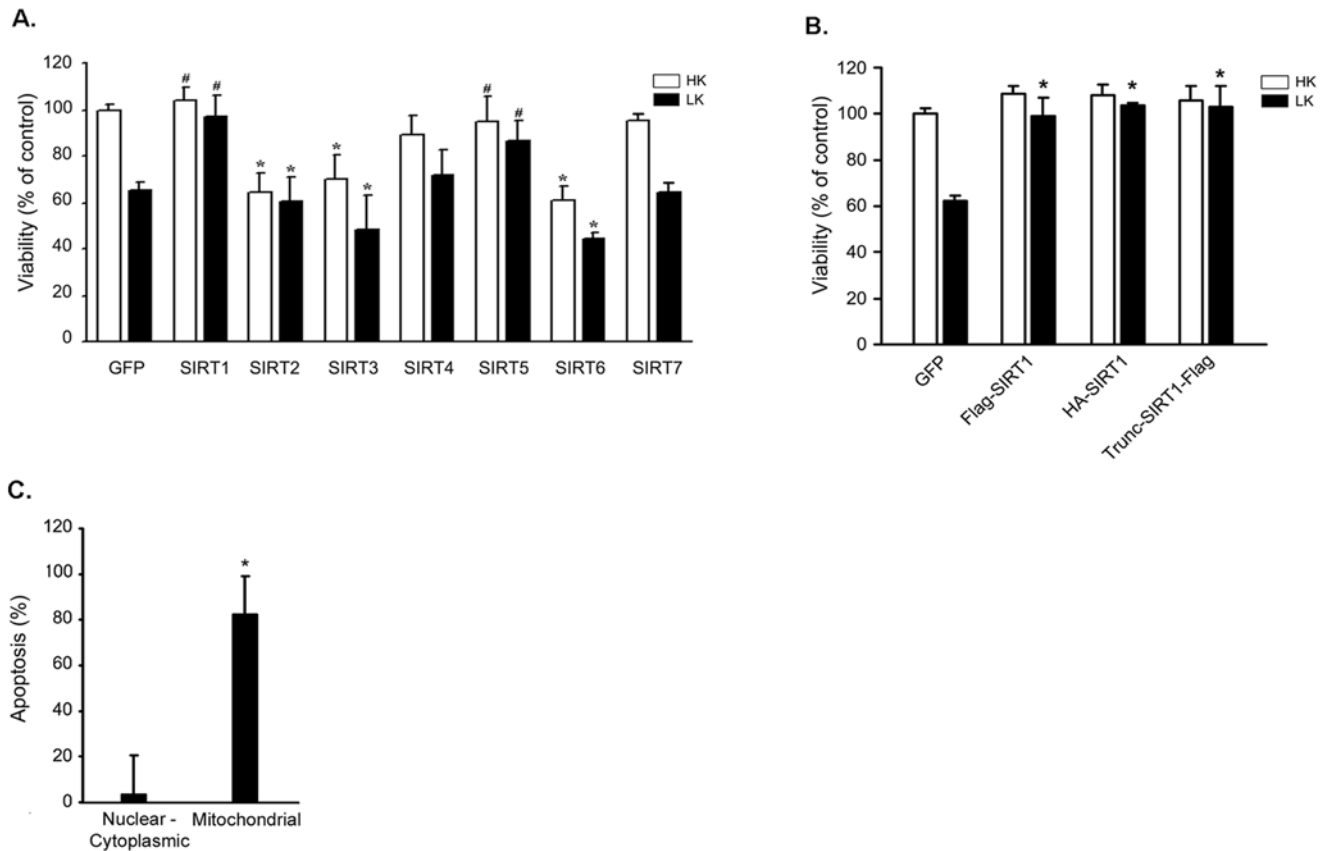

**Figure 1. Effect of SIRT 1–7 expression on neuronal survival.** (A) Sirtuin family expression and cerebellar granule neuron survival. Expression plasmids encoding Flag-tagged forms of SIRT 1–7 were transfected into CGNs and the cultures were switched to HK or LK medium. The proportion of transfected neurons that were apoptotic was quantified 24 hrs after the switch and compared with control cultures which were transfected with CMV-GFP. Viability for transfected cells was determined using DAPI staining of chromatin (\*indicates  $p < .05$  compared with GFP HK (control); # indicates  $p < .05$  compared with GFP LK). (B) Expression of other SIRT1 constructs in neurons confirms neuroprotection. Neurons were transfected with Flag-SIRT1 (tag on the N-terminus), HA-SIRT1, or Trunc-SIRT1-Flag and switched to HK or LK medium. The proportion of transfected neurons that were apoptotic was quantified 24 hrs after the switch and compared with control cultures which were transfected with CMV-GFP. Apoptosis was determined for transfected cells using DAPI staining (\* indicates  $p < .05$  compared with GFP LK; control = GFP HK). (C) SIRT5 localization and CGNs survival. SIRT5 localization in CGNs was determined by immunocytochemistry following SIRT5-Flag transfection and viability assessed using DAPI staining 24 after HK and LK treatment. The localization of viable and apoptotic SIRT5-Flag expressing cells was scored as nuclear and cytoplasmic or mitochondrial (\* indicates  $p < .05$  compared with nuclear-cytoplasmic). doi:10.1371/journal.pone.0004090.g001

SIRT1 substrates such as NF- $\kappa$ B, PGC-1 $\alpha$ , and p53, and can mimic the anti-apoptotic and anti-tumor activity of SIRT1 [21,48–51]. It has been shown that resveratrol activates SIRT1 and recapitulates its biological effects in cultured cells at 10  $\mu$ M [52–56]. As shown in Fig. 3C and as previously reported by Alvira et al. (2007), treatment with resveratrol at doses of up to 30  $\mu$ M did not prevent LK-mediated death of neurons. Our results from pharmacological activation and inhibition of SIRT1 suggest that SIRT1-mediated neuroprotection is independent of its deacetylase activity in CGNs.

### Mutant forms of SIRT1 lacking deacetylase activity are completely neuroprotective

To directly test the possibility that neuroprotection by SIRT1 was not dependent on its catalytic activity, we used a point-mutant form of SIRT1-H363Y which is catalytically inactive [14,40,57]. Figure 4 shows that this catalytically-inactive form of SIRT1 was as protective as the wild-type form when overexpressed in neurons. Complete neuroprotection was also observed with SIRT1-H355A, another catalytically-dead mutant form of SIRT1 that is commonly used (Fig. 4) [9,58–60]. Taken together with the failure

of SIRT1 inhibitors to reduce neuroprotection, this result confirms that the deacetylase activity of SIRT1 is not required for neuroprotection in CGNs.

**Forced sirtuin expression in the HT-22 mouse neuroblastoma cell line.** We next examined whether the effects observed with SIRT1, SIRT2, SIRT3, SIRT5, and SIRT6 on the regulation of LK-induced neuronal death extended to mouse HT-22 cells, a hippocampally-derived neuroblastoma cell line. HT-22 cells grow robustly in serum-containing medium but undergo apoptosis when maintained in serum-free medium. Apoptosis is also induced in these cells following treatment with homocysteic acid (HCA), a glutathione-depleting drug that causes oxidative stress [25,26,61]. We examined the effect of expressing each of the five SIRT proteins in HT-22 cells maintained in normal serum medium, treated with serum-free medium or treated with HCA. As shown in Fig. 5A, SIRT1 protects against HCA-induced and serum withdraw-induced apoptosis indicating that its protective action is versatile. Recent reports have described that SIRT1 shuttles to the cytoplasm upon oxidative stress rendering it incapable of exerting its inactivating effect on anti-apoptotic substrates within the nucleus and consequently sensitizing cells to

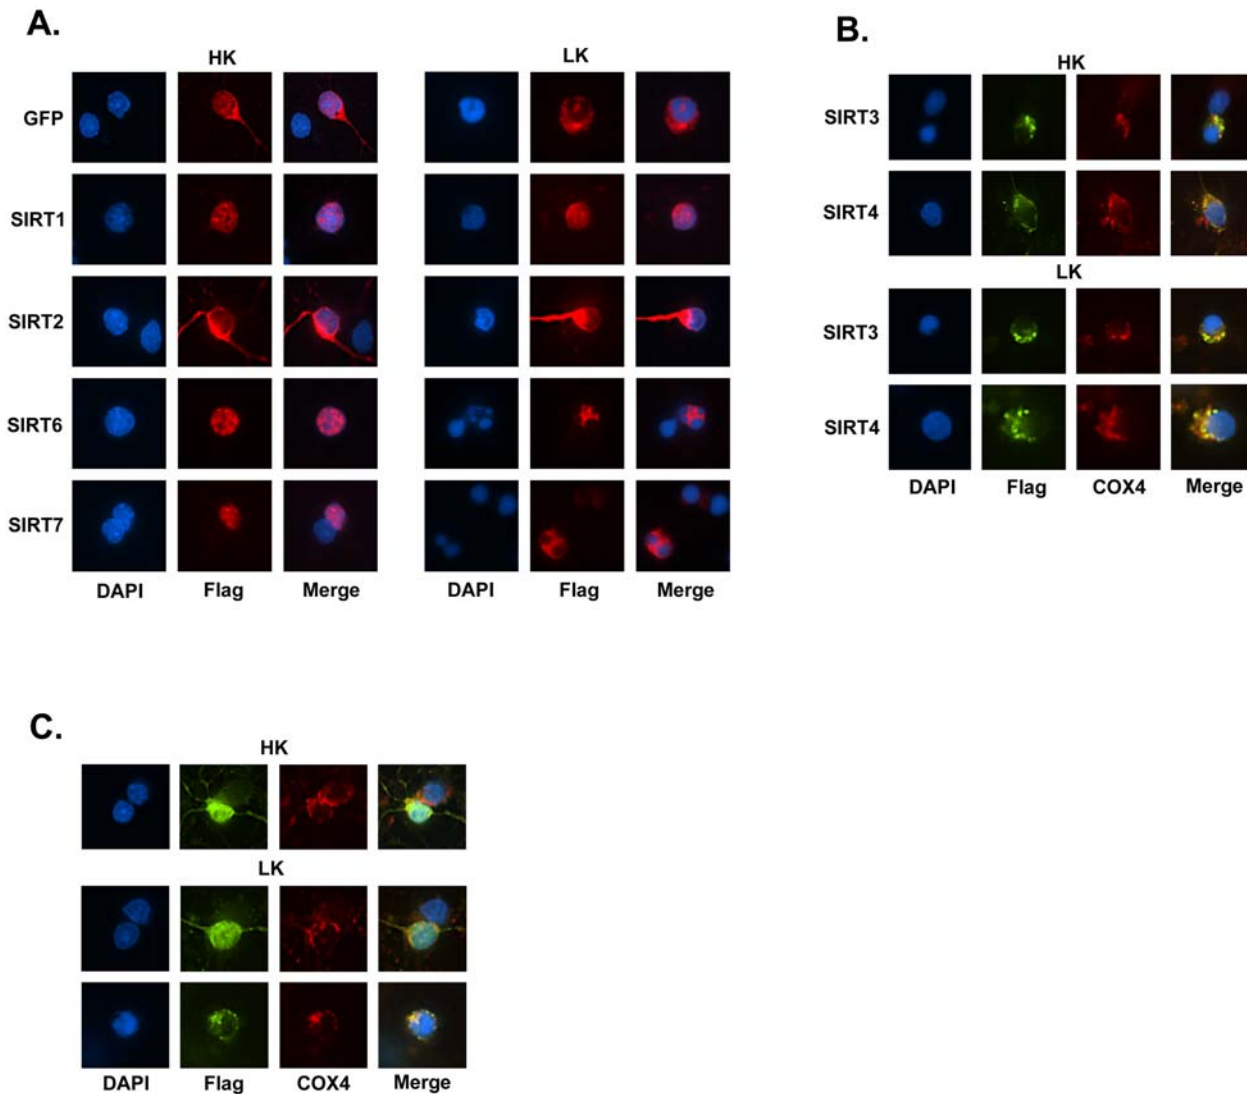

**Figure 2. Subcellular localization pattern of SIRT 1–7 in neurons.** Expression plasmids encoding Flag-tagged forms of SIRT 1–7 were transfected into CGNs and the cultures were switched to HK or LK medium. The localization of each sirtuin was visualized by immunocytochemistry using a Flag antibody. DAPI staining was used to label the nucleus. In some cases, Cox4 antibody was used to visualize mitochondria. Images were obtained with a Nikon Eclipse 80i using a 60 $\times$  objective. (A) Subcellular localization of SIRT1, SIRT2, SIRT6, and SIRT7 in HK and LK-treated neuronal cultures. Non-apoptotic cells were used for SIRT2 and SIRT6 in HK to show localization. (B) Mitochondrial localization of SIRT3 and SIRT4. The punctate pattern of SIRT3 and SIRT4 correspond to mitochondrial localization as evidenced by the overlap with Cox4 immunostaining. (C) Subcellular localization of SIRT5 in CGNs. In HK treatment SIRT5 predominately localizes to the cytoplasm, mitochondria, and nucleus (HK panel) while in LK SIRT5 can localize to the cytoplasm, mitochondria, and nucleus (upper LK panel) or to mitochondria (lower LK panel). Mitochondrial localization of SIRT5 is associated with apoptosis.

doi:10.1371/journal.pone.0004090.g002

oxidative-stress mediated apoptosis [8,27]. In HT-22 neuroblastoma cells however, SIRT1 is in the nucleus even following HCA-induced oxidative stress (Fig. 5B). As observed in CGNs, SIRT2 overexpression had an apoptotic effect on untreated neuroblastoma cells. However, SIRT2 did not enhance serum deprivation or HCA-induced cell death (Fig. 5A). As observed in neurons and in other cell types, SIRT2 was observed exclusively in the cytoplasm of HT-22 cells (Fig. 5B). In contrast to its generally protective action in CGNs, SIRT5 expression induces apoptosis in otherwise healthy neuroblastoma cells and also exacerbates the toxic effect of HCA. Also in contrast to CGNs in which SIRT5 was generally not restricted to the mitochondria, we find that SIRT5 colocalizes with the mitochondrial marker Cox4 in HT-22 cells (Fig. 5B). Such a

mitochondrial pattern of localization has been described for SIRT5 previously [17]. Expression of SIRT3 promotes apoptosis in neuroblastoma cells and enhances HCA lethality, whereas SIRT6 does not induce HT-22 cell death (Fig. 5A). In fact, SIRT6 exhibits a modest protective effect against HCA treatment contrary to its toxic role in the CGN apoptosis paradigm used in this study. Both SIRT3 and SIRT6 exhibit localization patterns similar to those seen in CGNs and consistent with previous reports in other cell types (Fig. 5B) [17].

## Discussion

Emerging evidence suggests that sirtuins are involved in the regulation of neuronal survival and death. The overall consensus

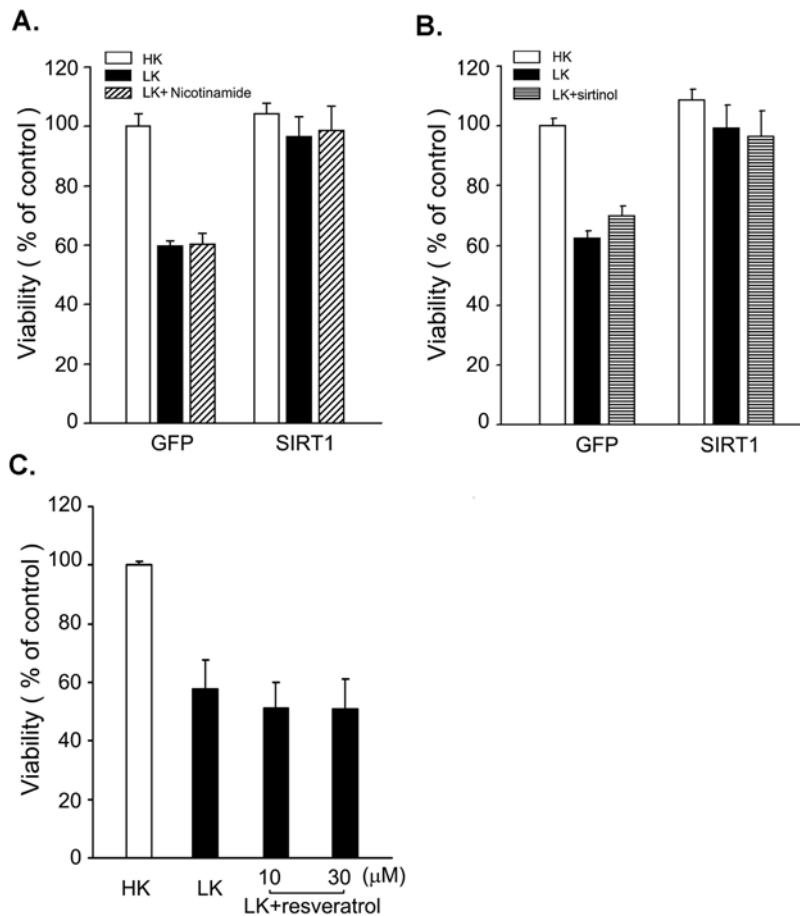

**Figure 3. Pharmacological modulators of SIRT1 activity have no effect on neuroprotection.** (A) Neurons treated with nicotinamide. CGNs were transfected with Flag-tagged SIRT1 or GFP control vector and the cultures switched to LK medium or LK-medium supplemented with 5 mM nicotinamide. Viability of transfected neurons (detected by Flag immunocytochemistry) was quantified 24 hours later (\* indicates  $p < .05$  compared with GFP LK; # indicates  $p < .05$  compared with GFP HK). (B) Sirtinol does not affect SIRT1 protection. Flag-tagged SIRT1 and GFP vectors were transfected into CGNs. The neurons were then treated with LK medium or LK-medium supplemented with 100  $\mu$ M sirtinol. Survival for SIRT1-transfected neurons was assessed using immunocytochemistry and DAPI staining 24 hours following treatment (\* indicates  $p < .05$  compared with GFP LK; # indicates  $p < .05$  compared with GFP HK). (C) Resveratrol cannot rescue neurons in LK. Cultured CGNs were switched to HK medium, LK medium, or LK medium containing 10 or 30  $\mu$ M resveratrol. Neuronal viability was quantified 24 hours later by DAPI staining. doi:10.1371/journal.pone.0004090.g003

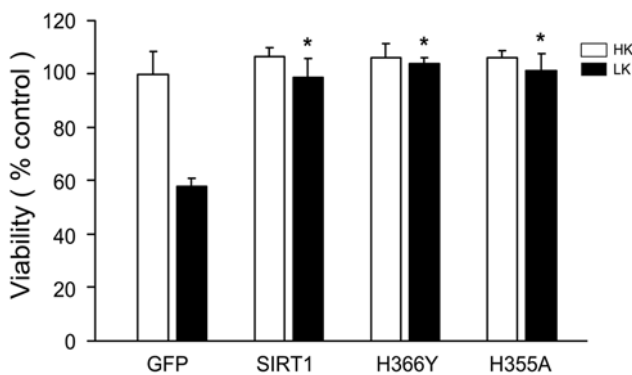

**Figure 4. A deacetylase-deficient form of SIRT1 is neuroprotective.** CGNs were transfected with vectors encoding GFP, Flag-tagged wild-type form of SIRT1, or the deacetylase-dead mutation forms of SIRT1, H363Y or H355A. The cultures were then switched to HK or LK medium for 24 hours and viability of transfected neurons was quantified by DAPI staining (\* indicates  $p < .05$  compared with GFP LK). doi:10.1371/journal.pone.0004090.g004

from these studies is that SIRT1 has neuroprotective activity that is mediated by deacetylation of molecules such as p53 and PGC-1 $\alpha$  [10,22]. In contrast, SIRT2 has been reported to promote neurodegeneration in experimental models of Parkinson's disease [23]. In this study we examined the influence of all seven members of this sub-family of HDAC proteins on the survival of CGNs. It is noteworthy that the activities of SIRTs 3–7 have not been previously studied in the context of neuronal survival. We report for the first time that SIRT5 has neuroprotective activity, while SIRT3 and SIRT6 are neurotoxic when overexpressed in neurons. With the exception of SIRT5, the subcellular localization pattern of these sirtuin proteins in CGNs is as previously reported in non-neuronal cell types. Whereas SIRT5 is strictly mitochondrial in other cell types, in CGNs it is generally present in the cytoplasm, nucleus and mitochondria with only a small proportion of cells displaying selective mitochondrial localization. We find that when localized to the mitochondria the protective activity of SIRT5 is replaced by a pro-apoptotic effect. More work is necessary to delineate what factors and mechanisms determine the localization of SIRT5 within cells.

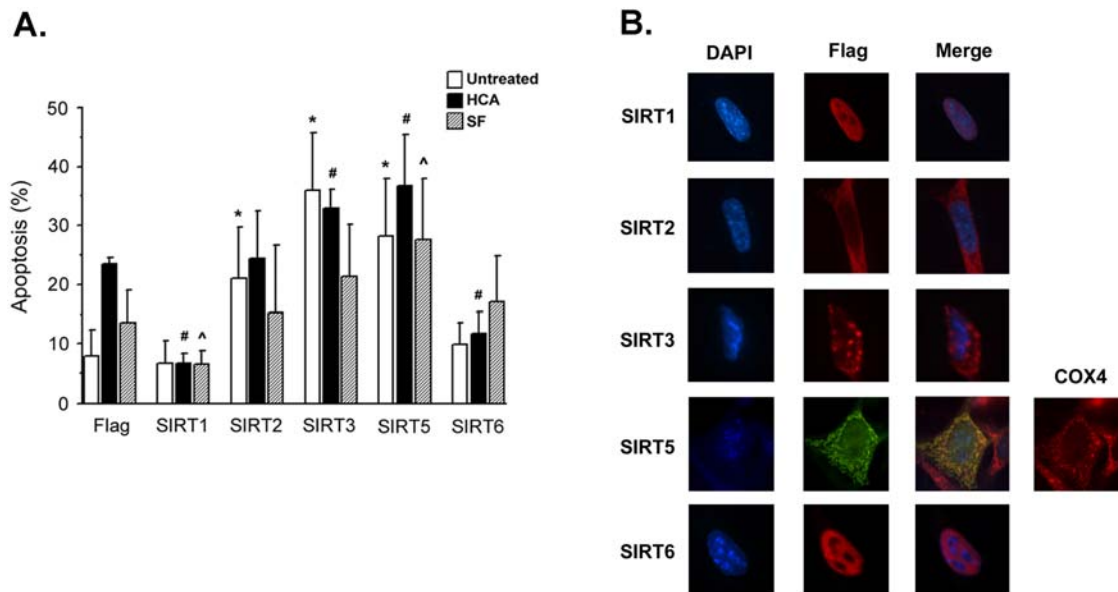

**Figure 5. Forced sirtuin expression in the HT-22 cells.** (A) Effect of sirtuin expression on HT-22 cell survival. Sirtuin expression levels were enhanced in HT-22 neuroblastoma cells via transfection with mammalian expression plasmids. HT-22 cells were treated 24 hours following transfection with normal growth medium (untreated), 1 mM HCA or Serum-free (SF) medium for 24 hours. The viability of transfected cells was determined using a TUNEL assay. The mean of 5 experiments were taken (\* indicates  $p < .05$  compared with Flag untreated sample; # indicates  $p < .05$  compared with Flag HCA sample; ^ indicates  $p < .05$  compared with Flag SF sample). (B) Subcellular localization of exogenous SIRT1, SIRT2, SIRT3, SIRT5 and SIRT6 in HT-22 cells. HT-22 cells were transfected with SIRT-Flag constructs and immunocytochemistry performed using a Flag antibody. DAPI staining was used to visualize nuclei/chromatin. SIRT5 shows colocalization with the mitochondrial protein Cox4. doi:10.1371/journal.pone.0004090.g005

To test whether the various sirtuins found to affect survival of CGNs have similar effects in another model of neuronal apoptosis, we used hippocampus-derived HT-22 neuroblastoma cells. While the anti- and pro-survival effects of SIRT1, SIRT2, and SIRT3 were preserved in HT-22 cells, there were differences in the cases of SIRT5 and SIRT6. Expression of SIRT5, which is generally protective in CGNs, is apoptotic in HT22 cells and potentiates the level of cell death induced by HCA treatment or serum withdrawal. In CGNs protection by SIRT5 is associated with a non-mitochondrial subcellular localization. In fact, neuronal viability is low when this protein is localized to mitochondria. In HT-22 neuroblastoma cells, SIRT5 is almost always mitochondrially-associated (Fig. 5B). These observations suggest that the opposing action of SIRT5 on neuronal viability is likely to be dictated by its subcellular localization. In the case of SIRT6, the pro-apoptotic action seen in CGNs is not observed in HT-22 cells although its subcellular localization pattern is the same in both cell types. This result suggests that differences in intracellular context or protein-protein interactions may determine activity of SIRT6 with respect to the regulation of apoptosis.

All biological effects of sirtuins have so far been attributed to their enzymatic activity. Intensive effort is being spent on identifying small-molecule pharmacological modulators of sirtuin activity as therapeutic tools to treat neurodegenerative diseases as well as other age-related disorders such as type 2 diabetes, cancer, inflammation and cardiovascular disease (reviewed in [1]; [3,4,21]). An interesting and novel finding of our study is that the neuroprotection by SIRT1 is not affected by nicotinamide, a potent and noncompetitive inhibitor of the sirtuins. Sirtinol, a pharmacological inhibitor of SIRT1 with a distinct mechanism of action, also fails to reduce neuroprotection by SIRT1. Other investigators have established the selectivity and potency of sirtinol as a selective SIRT1 inhibitor by showing that its biological effects are faithfully mimicked by SIRT1 siRNA and that it can neutralize the actions of pharmacological SIRT1 activators [22].

We also find that resveratrol, a commonly-used agonist of SIRT1 as well as other sirtuins, does not protect neurons against LK-induced neuronal death. This finding is consistent with the results of Alvira et al., 2007 who also failed to observe protection with resveratrol in LK-treated CGNs [35]. Most convincingly, we find that two separate point-mutant forms of SIRT1, H363Y and H355A, are both as protective as wild-type SIRT1 in CGNs. Previous work by a number of other laboratories has established that both of these two mutant forms of SIRT1 have no detectable deacetylase activity *in vitro* or in transfected cells [9,14,57–60,62]. SIRT1 also has weak ADP-ribosyltransferase activity [63]. This ADP-ribosyltransferase activity is required for the interaction of SIRT1 with PGC1 $\alpha$ , but not its interaction with p53 or Foxo3a [42]. We have used a mutant SIRT construct, SIRT1-G261A which lacks ADP-ribosyltransferase activity [42] and found that its overexpression is fully protective against LK-induced neuronal death (Ma and D'Mello, unpublished observation). Our results therefore suggest a novel, non-catalytic mechanism of action for SIRT1-mediated neuroprotection. Further effort will be necessary to define what this mechanism is but one possibility is that it involves interactions between SIRT1 and other apoptosis-regulatory proteins. Association between SIRT1 and p53, p65, c-jun and E2F1, all of which are involved in regulating neuronal apoptosis, has previously been reported (reviewed in [1]; [55,64–66]).

An obvious caveat of our study is that it relies solely on ectopically-expressed proteins. It is likely that overexpression represents an amplification of the normal activity of these proteins on neuronal survival. But it is also possible that the effects we observe represent an artifact of overexpression and as such have little physiological relevance. Further investigation using siRNA-mediated suppression of endogenous sirtuins or utilization of cultures from knock-out mice lacking individual sirtuins will be necessary to study this issue. Besides physiological relevance however, our finding that SIRT1 and SIRT5 are neuroprotective when expressed at elevated levels raises the possibility that

increasing endogenous expression of these two proteins within vulnerable neuronal populations pharmacologically, or ectopically expressing them at high levels (using viral vectors for example) could represent viable therapeutic approaches to prevent neuronal loss in neurodegenerative diseases.

In conclusion, our study represents the first investigation of the effects of SIRT3–7 on the regulation of neuronal survival. Moreover, we show for the first time that in addition to inhibiting cell death by deacetylating apoptosis-regulatory proteins, SIRT1 can act through a novel, catalytic-independent mechanism to protect against apoptosis. And finally, we show that SIRT5 can have contrasting effects on neuronal viability, which is dictated by its subcellular localization.

## Materials and Methods

### Materials

Unless otherwise indicated, all tissue culture reagents and Lipofectamine 2000 were purchased from Invitrogen (Invitrogen, Carlsbad, CA). Flag antibody, cytosine arabinofuranoside and DAPI were from Sigma (St. Louis, MO). Cox4 antibody was from Santa Cruz Biotechnology (Santa Cruz, CA). Expression plasmids for Flag-tagged SIRT1–SIRT7, HA-tagged SIRT1, Flag-tagged SIRT1-H363Y and Flag-tagged SIRT-G261A were purchased from Addgene (Addgene, Cambridge, MA). Flag-tagged SIRT1-H355A was provided by Dr. Jiandong Chen (H. Lee Moffitt Cancer Center, Tampa, FL). All cDNAs were sequenced and the expression of a protein of the correct size verified following transfection of HEK293T cells.

### Culturing of cerebellar granule neurons and HT-22 cells

Cerebellar granule neurons were cultured from 7–8 day old Wistar rats (Charles River, Wilmington, MA) as previously described [24]. The cultures were plated in 24-well poly-L-lysine coated dishes with glass coverslips at a density of  $1 \times 10^6$  cells/well in basal Eagle's medium with Earle's salts (BME) supplemented with 10% FBS, 25 mM KCl, 2 mM glutamine and 100 µg/mL gentamicin. To prevent the proliferation of the small number of non-neuronal cells, cytosine arabinofuranoside (10 µM) was added to the culture medium about 20 hrs after plating. HT-22 cells were maintained in Dulbecco's Modified Eagle's Medium (DMEM) supplemented with 10% FBS, penicillin and streptomycin.

### Transfection of primary neurons

The neuronal cultures were transfected 4–5 days after plating using cesium chloride-purified plasmid DNA and the calcium

phosphate method as previously described [67]. 3 µg/mL of plasmid DNA was used per well. A day after transfection, the cells were rinsed once and then maintained in serum-free BME medium containing either 5 mM KCl (low potassium, LK) or 25 mM KCl (high potassium, HK). Control cultures were transfected with CMV-GFP. Transfected neurons were detected by GFP fluorescence or by immunostaining using Flag antibody (for all seven sirtuin proteins). Neuronal viability was quantified by staining cell nuclei with DAPI as previously described [67,68]. Condensed or fragmented nuclei were scored as apoptotic. Double staining was performed to determine the subcellular localization of mitochondrial SIRT3. Ectopically expressed SIRT3 were detected using a Flag antibody and a Cox4 antibody was used to label mitochondria. For immunocytochemistry, both Flag antibody and Cox4 antibody were used at 1:200 dilution.

### Transfection of HT-22 cells

Cells were plated at a density of  $1.5 \times 10^4$  cells/well in 24 well plates in antibiotic-free DMEM medium with 10% FBS. Transfection was carried out using 1 µg/mL of plasmid DNA and Lipofectamine 2000 according to manufacturer's instructions. Exogenous genes were allowed to express for 24 hours at which time the cells were treated with fresh normal growth medium, 1 mM HCA or DMEM without FBS. Approximately 17 hours after treatment the viability of transfected cells was determined using immunocytochemistry and a TUNEL assay (Promega, Madison, WI) that detects cleaved DNA characteristic of apoptotic cells.

### Statistics

Graphs represent mean values obtained from three or more independent experiments. Error bars show standard deviation from three separate experiments. Statistical analysis for graphical data was performed using an unpaired t-test (student t-test). P values of  $<0.05$  were deemed statistically significant.

### Acknowledgments

The authors also thank Lulu Wang for help with the culturing of neurons and Dr. Jiandong Chen (H. Lee Moffitt Cancer Center, Tampa, FL) for the Flag-tagged SIRT-H355A expression plasmid.

### Author Contributions

Conceived and designed the experiments: JAP CM BEM SD. Performed the experiments: JAP CM BEM. Analyzed the data: JAP CM BEM SD. Wrote the paper: BEM SD.

## References

- Saunders LR, Verdin E (2007) Sirtuins: critical regulators at the crossroads between cancer and aging. *Oncogene* 26: 5489–5504.
- Gan L, Mucke L (2008) Paths of convergence: sirtuins in aging and neurodegeneration. *Neuron* 58: 10–14.
- Milne JC, Denu JM (2008) The Sirtuin family: therapeutic targets to treat diseases of aging. *Curr Opin Chem Biol* 12: 11–17.
- Outeiro TF, Marques O, Kazantsev A (2008) Therapeutic role of sirtuins in neurodegenerative disease. *Biochim Biophys Acta* 1782: 363–369.
- North BJ, Marshall BL, Borra MT, Denu JM, Verdin E (2003) The human Sir2 ortholog, SIRT2, is an NAD<sup>+</sup>-dependent tubulin deacetylase. *Mol Cell* 11: 437–444.
- Liszt G, Ford E, Kurtev M, Guarente L (2005) Mouse Sir2 homolog SIRT6 is a nuclear ADP-ribosyltransferase. *J Biol Chem* 280: 21313–21320.
- Ahuja N, Schwer B, Carobbio S, Waltregny D, North BJ, et al. (2007) Regulation of insulin secretion by SIRT4, a mitochondrial ADP-ribosyltransferase. *J Biol Chem* 282: 33583–33592.
- Tanno M, Sakamoto J, Miura T, Shimamoto K, Horio Y (2007) Nucleocytoplasmic shuttling of the NAD<sup>+</sup>-dependent histone deacetylase SIRT1. *J Biol Chem* 282: 6823–6832.
- Hisahara S, Chiba S, Matsumoto H, Tanno M, Yagi H, et al. (2008) Histone deacetylase SIRT1 modulates neuronal differentiation by its nuclear translocation. *Proc Natl Acad Sci U S A* 105: 15599–15604.
- Kim EJ, Kho JH, Kang MR, Um SJ (2007) Active regulator of SIRT1 cooperates with SIRT1 and facilitates suppression of p53 activity. *Mol Cell* 28: 277–290.
- Chen WY, Wang DH, Yen RC, Luo J, Gu W, et al. (2005) Tumor suppressor HIC1 directly regulates SIRT1 to modulate p53-dependent DNA-damage responses. *Cell* 123: 437–448.
- Kim JE, Chen J, Lou Z (2008) DBC1 is a negative regulator of SIRT1. *Nature* 451: 583–586.
- Zhao W, Kruse JP, Tang Y, Jung SY, Qin J, et al. (2008) Negative regulation of the deacetylase SIRT1 by DBC1. *Nature* 451: 587–590.
- Kim D, Nguyen MD, Dobbin MM, Fischer A, Sananbenesi F, et al. (2007) SIRT1 deacetylase protects against neurodegeneration in models for Alzheimer's disease and amyotrophic lateral sclerosis. *Embo J* 26: 3169–3179.
- Jin YH, Kim YJ, Kim DW, Baek KH, Kang BY, et al. (2008) Sirt2 interacts with 14-3-3 beta/gamma and down-regulates the activity of p53. *Biochem Biophys Res Commun* 368: 690–695.

16. Vaquero A, Scher MB, Lee DH, Sutton A, Cheng HL, et al. (2006) SirT2 is a histone deacetylase with preference for histone H4 Lys 16 during mitosis. *Genes Dev* 20: 1256–1261.
17. Michishita E, Park JY, Burneskis JM, Barrett JC, Horikawa I (2005) Evolutionarily conserved and nonconserved cellular localizations and functions of human SIRT proteins. *Mol Biol Cell* 16: 4623–4635.
18. Nakamura Y, Ogura M, Tanaka D, Inagaki N (2008) Localization of mouse mitochondrial SIRT proteins: shift of SIRT3 to nucleus by co-expression with SIRT5. *Biochem Biophys Res Commun* 366: 174–179.
19. Westphal CH, Dipp MA, Guarente L (2007) A therapeutic role for sirtuins in diseases of aging? *Trends Biochem Sci* 32: 555–560.
20. Li Y, Yokota T, Gama V, Yoshida T, Gomez JA, et al. (2007) Bax-inhibiting peptide protects cells from polyglutamine toxicity caused by Ku70 acetylation. *Cell Death Differ* 14: 2058–2067.
21. Anekonda TS (2006) Resveratrol—a boon for treating Alzheimer's disease? *Brain Res Rev* 52: 316–326.
22. Shindler KS, Ventura E, Rex TS, Elliott P, Rostami A (2007) SIRT1 activation confers neuroprotection in experimental optic neuritis. *Invest Ophthalmol Vis Sci* 48: 3602–3609.
23. Outeiro TF, Kontopoulos E, Altmann SM, Kufareva I, Strathearn KE, et al. (2007) Sirtuin 2 inhibitors rescue alpha-synuclein-mediated toxicity in models of Parkinson's disease. *Science* 317: 516–519.
24. D'Mello SR, Galli C, Ciotti T, Calissano P (1993) Induction of apoptosis in cerebellar granule neurons by low potassium: inhibition of death by insulin-like growth factor I and cAMP. *Proc Natl Acad Sci U S A* 90: 10989–10993.
25. Morozova N, Khrapko K, Pancec J, Liu W, Harney JW, et al. (2007) Glutathione depletion in hippocampal cells increases levels of H and L ferritin and glutathione S-transferase mRNAs. *Genes Cells* 12: 561–567.
26. Chen H-MWL, D'Mello SR. A chemical compound commonly used to inhibit PKR, {8-(imidazol-4-ylmethylene)-6H-azolidino[5,4-g]benzothiazol-7-one}, protects neurons by inhibiting cyclin-dependent kinase. *Eur J Neurosci* (in press).
27. Jin Q, Yan T, Ge X, Sun C, Shi X, et al. (2007) Cytoplasm-localized SIRT1 enhances apoptosis. *J Cell Physiol* 213: 88–97.
28. Beausoleil SA, Villen J, Gerber SA, Rush J, Gygi SP (2006) A probability-based approach for high-throughput protein phosphorylation analysis and site localization. *Nat Biotechnol* 24: 1285–1292.
29. Beausoleil SA, Jedrychowski M, Schwartz D, Elias JE, Villen J, et al. (2004) Large-scale characterization of HeLa cell nuclear phosphoproteins. *Proc Natl Acad Sci U S A* 101: 12130–12135.
30. Ota H, Akishita M, Eto M, Iijima K, Kaneki M, et al. (2007) Sirt1 modulates premature senescence-like phenotype in human endothelial cells. *J Mol Cell Cardiol* 43: 571–579.
31. Bastianetto S, Zheng WH, Quirion R (2000) Neuroprotective abilities of resveratrol and other red wine constituents against nitric oxide-related toxicity in cultured hippocampal neurons. *Br J Pharmacol* 131: 711–720.
32. Han YS, Zheng WH, Bastianetto S, Chabot JG, Quirion R (2004) Neuroprotective effects of resveratrol against beta-amyloid-induced neurotoxicity in rat hippocampal neurons: involvement of protein kinase C. *Br J Pharmacol* 141: 997–1005.
33. Araki T, Sasaki Y, Milbrandt J (2004) Increased nuclear NAD biosynthesis and SIRT1 activation prevent axonal degeneration. *Science* 305: 1010–1013.
34. Parker JA, Arango M, Abderrahmane S, Lambert E, Tourette C, et al. (2005) Resveratrol rescues mutant polyglutamine cytotoxicity in nematode and mammalian neurons. *Nat Genet* 37: 349–350.
35. Alvira D, Yeste-Velasco M, Folch J, Verdagué E, Canudas AM, et al. (2007) Comparative analysis of the effects of resveratrol in two apoptotic models: inhibition of complex I and potassium deprivation in cerebellar neurons. *Neuroscience* 147: 746–756.
36. Okawara M, Katsuki H, Kurimoto E, Shibata H, Kume T, et al. (2007) Resveratrol protects dopaminergic neurons in midbrain slice culture from multiple insults. *Biochem Pharmacol* 73: 550–560.
37. Bitterman KJ, Anderson RM, Cohen HY, Latorre-Esteves M, Sinclair DA (2002) Inhibition of silencing and accelerated aging by nicotinamide, a putative negative regulator of yeast sir2 and human SIRT1. *J Biol Chem* 277: 45099–45107.
38. Avalos JL, Bever KM, Wolberger C (2005) Mechanism of sirtuin inhibition by nicotinamide: altering the NAD(+) cosubstrate specificity of a Sir2 enzyme. *Mol Cell* 17: 855–868.
39. Sanders BD, Zhao K, Slama JT, Marmorstein R (2007) Structural basis for nicotinamide inhibition and base exchange in Sir2 enzymes. *Mol Cell* 25: 463–472.
40. Brunet A, Sweeney LB, Sturgill JF, Chua KF, Greer PL, et al. (2004) Stress-dependent regulation of FOXO transcription factors by the SIRT1 deacetylase. *Science* 303: 2011–2015.
41. Luo J, Nikolaev AY, Imai S, Chen D, Su F, et al. (2001) Negative control of p53 by Sir2alpha promotes cell survival under stress. *Cell* 107: 137–148.
42. Nemoto S, Fergusson MM, Finkel T (2005) SIRT1 functionally interacts with the metabolic regulator and transcriptional coactivator PGC-1{alpha}. *J Biol Chem* 280: 16456–16460.
43. Ota H, Tokunaga E, Chang K, Hikasa M, Iijima K, et al. (2006) Sirt1 inhibitor, Sirtinol, induces senescence-like growth arrest with attenuated Ras-MAPK signaling in human cancer cells. *Oncogene* 25: 176–185.
44. Kojima K, Ohhashi R, Fujita Y, Hamada N, Akao Y, et al. (2008) A role for SIRT1 in cell growth and chemoresistance in prostate cancer PC3 and DU145 cells. *Biochem Biophys Res Commun* 373: 423–428.
45. Grozinger CM, Chao ED, Blackwell HE, Moazed D, Schreiber SL (2001) Identification of a class of small molecule inhibitors of the sirtuin family of NAD-dependent deacetylases by phenotypic screening. *J Biol Chem* 276: 38837–38843.
46. Biacs R, Kumari D, Usdin K (2008) SIRT1 inhibition alleviates gene silencing in Fragile X mental retardation syndrome. *PLoS Genet* 4: e1000017.
47. Neugebauer RC, Uchichowska U, Meier R, Hruby H, Valkov V, et al. (2008) Structure-activity studies on splitomicin derivatives as sirtuin inhibitors and computational prediction of binding mode. *J Med Chem* 51: 1203–1213.
48. Howitz KT, Bitterman KJ, Cohen HY, Lamming DW, Lavu S, et al. (2003) Small molecule activators of sirtuins extend *Saccharomyces cerevisiae* lifespan. *Nature* 425: 191–196.
49. Manna SK, Mukhopadhyay A, Aggarwal BB (2000) Resveratrol suppresses TNF-induced activation of nuclear transcription factors NF-kappa B, activator protein-1, and apoptosis: potential role of reactive oxygen intermediates and lipid peroxidation. *J Immunol* 164: 6509–6519.
50. Lagouge M, Argmann C, Gerhart-Hines Z, Meziane H, Lerin C, et al. (2006) Resveratrol improves mitochondrial function and protects against metabolic disease by activating SIRT1 and PGC-1alpha. *Cell* 127: 1109–1122.
51. Knutson MD, Leeuwenburgh C (2008) Resveratrol and novel potent activators of SIRT1: effects on aging and age-related diseases. *Nutr Rev* 66: 591–596.
52. Picard F, Kurtev M, Chung N, Topark-Ngarm A, Senawong T, et al. (2004) Sirt1 promotes fat mobilization in white adipocytes by repressing PPAR-gamma. *Nature* 429: 771–776.
53. Dasgupta B, Milbrandt J (2007) Resveratrol stimulates AMP kinase activity in neurons. *Proc Natl Acad Sci U S A* 104: 7217–7222.
54. Cao C, Lu S, Kivlin R, Wallin B, Card E, et al. (2008) SIRT1 confers protection against UVB- and H(2)O(2)-induced cell death via modulation of p53 and JNK in cultured skin keratinocytes. *J Cell Mol Med*.
55. Gao Z, Ye J (2008) Inhibition of transcriptional activity of c-JUN by SIRT1. *Biochem Biophys Res Commun* 376: 793–796.
56. Venkatesan B, Ghosh-Choudhury N, Das F, Mahimainathan L, Kamat A, et al. (2008) Resveratrol inhibits PDGF receptor mitogenic signaling in mesangial cells: role of PTP1B. *Faseb J* 22: 3469–3482.
57. Huang J, Gan Q, Han L, Li J, Zhang H, et al. (2008) SIRT1 overexpression antagonizes cellular senescence with activated ERK/S6k1 signaling in human diploid fibroblasts. *PLoS ONE* 3: e1710.
58. Rodgers JT, Lerin C, Haas W, Gygi SP, Spiegelman BM, et al. (2005) Nutrient control of glucose homeostasis through a complex of PGC-1alpha and SIRT1. *Nature* 434: 113–118.
59. Hou X, Xu S, Maitland-Toolan KA, Sato K, Jiang B, et al. (2008) SIRT1 regulates hepatocyte lipid metabolism through activating AMP-activated protein kinase. *J Biol Chem* 283: 20015–20026.
60. Lan F, Caciccedo JM, Ruderman N, Ido Y (2008) SIRT1 modulation of the acetylation status, cytosolic localization, and activity of LKB1. Possible role in AMP-activated protein kinase activation. *J Biol Chem* 283: 27628–27635.
61. Langley B, D'Annibale MA, Suh K, Ayoub I, Tolhurst A, et al. (2008) Pulse inhibition of histone deacetylases induces complete resistance to oxidative death in cortical neurons without toxicity and reveals a role for cytoplasmic p21(waf1/cip1) in cell cycle-independent neuroprotection. *J Neurosci* 28: 163–176.
62. Vaziri H, Dessain SK, Ng Eaton E, Imai SI, Frye RA, et al. (2001) hSIR2(SIRT1) functions as an NAD-dependent p53 deacetylase. *Cell* 107: 149–159.
63. Frye RA (1999) Characterization of five human cDNAs with homology to the yeast SIR2 gene: Sir2-like proteins (sirtuins) metabolize NAD and may have protein ADP-ribosyltransferase activity. *Biochem Biophys Res Commun* 260: 273–279.
64. Verdin E (2007) AROuSing SIRT1: identification of a novel endogenous SIRT1 activator. *Mol Cell* 28: 354–356.
65. Feige JN, Auwerx J (2008) Transcriptional targets of sirtuins in the coordination of mammalian physiology. *Curr Opin Cell Biol* 20: 303–309.
66. Dey S, Bakthavatchalu V, Tseng MT, Wu P, Florence RL, et al. (2008) Interactions between SIRT1 and AP-1 reveal a mechanistic insight into the growth promoting properties of alumina (Al2O3) nanoparticles in mouse skin epithelial cells. *Carcinogenesis* 29: 1920–1929.
67. Koulich E, Nguyen T, Johnson K, Giardina C, D'Mello S (2001) NF-kappaB is involved in the survival of cerebellar granule neurons: association of IkappaBbeta [correction of Ikappabeta] phosphorylation with cell survival. *J Neurochem* 76: 1188–1198.
68. Yalcin A, Koulich E, Mohamed S, Liu L, D'Mello SR (2003) Apoptosis in cerebellar granule neurons is associated with reduced interaction between CREB-binding protein and NF-kappaB. *J Neurochem* 84: 397–408.
